# Supplementary material
Source: PubMed Central journal article supplement (PMC10351222)
Supplement: NIHMS1912737-supplement-Supplementary_Table_1.pdf [file NIHMS1912737-supplement-Supplementary_Table_1.pdf]

**Supplementary Table 1. Antibodies Information**

| Target                | Vendor          | Catalogue No.                             | Application              |
|-----------------------|-----------------|-------------------------------------------|--------------------------|
| Sox9                  | CST             | 82630                                     | WB (1:1000), IHC (1:100) |
| HRS                   | CST             | 15087                                     | WB (1:1000)              |
| phospho-Akt           | CST             | 4060                                      | WB (1:1000)              |
| Phospho-Atk substrate | CST             | 9614                                      | WB (1:1000)              |
| Phospho-ERK1/2        | CST             | 4370                                      | WB (1:1000)              |
| c-myc                 | CST             | 18583                                     | WB (1:1000)              |
| Hes1                  | CST             | 11988                                     | WB (1:1000)              |
| GAPDH                 | CST             | 2118                                      | WB (1:1000)              |
| Hes1                  | Bioss           | bs-2972R                                  | IHC (1:100)              |
| Jagged1               | CST             | 70109                                     | WB (1:1000), IF (1:200)  |
| CD63                  | Abcam           | ab8219                                    | IF (1:500)               |
| CD63                  | Abcam           | ab134045                                  | WB (1:1000)              |
| CD63                  | Abcam           | ab217345                                  | WB (1:1000)              |
| Rab8                  | BD              | 610844                                    | WB (1:1000)              |
| LAMP1                 | DHSB            | H4A3                                      | IF (1:500)               |
| Flag tag              | Sigma           | F3165, F1804                              | WB (1:1000), IF (1:500)  |
| Rabin8                | Proteintech     | 12321-1-AP                                | WB (1:1000)              |
| HA tag                | Roche           | 11583816001                               | WB (1:1000)              |
| Ki67                  | CST             | 12202                                     | IHC (1:100)              |
| PCNA                  | CST             | 2586                                      | IHC (1:100)              |
| Cleaved Caspase-3     | CST             | 9664                                      | IHC (1:100)              |
| TSG101                | Santa-Cruz      | C2:sc-7964                                | WB (1:1000)              |
| Syntenin-1            | Abcam           | ab19903                                   | WB (1:1000)              |
| Grp94                 | CST             | D6X2Q #20292                              | WB (1:1000)              |
| Alix                  | Santa-Cruz      | (1A12): sc-53540                          | WB (1:1000)              |
| GFP                   | n/a<br>homemade | n/a                                       | WB (1:1000)              |
| Rab27a                | CST<br>Sicgen   | CST (D7Z9Q,<br>69295), Sicgen,<br>#AB0023 | WB (1:1000)              |
| Pan-Akt               | CST             | #4685                                     | WB (1:1000)              |

WB: Western blotting; IF: Immunofluorescence; IHC: Immunohistochemistry.
